# Supplementary material for: Graded Egfr activity patterns theDrosophilaeggshell independently of autocrine feedback
Source: Oxford University Press journal article supplement (doi:10.1242/dev.036103), 2009-07-30
Supplement: dev036103tables1.pdf [file dev036103tables1.pdf]

**Table S1. Frequency and appendage phenotype of intact eggs recovered from *P[decDN]* females in the absence of heat-shock-induced mitotic recombination**

| Genotype                                                                                       | Total eggs | Intact % (n) | Appendage phenotype |                |                 |                  |
|------------------------------------------------------------------------------------------------|------------|--------------|---------------------|----------------|-----------------|------------------|
|                                                                                                |            |              | Wild type           | Bases touching | Partially fused | Completely fused |
| <i>rho</i> <sup>7M43</sup> <i>FRT</i> <sup>80B</sup> / <i>P[decDN]118.3 FRT</i> <sup>80B</sup> | 1223       | 0 (0)        | n.a.                | n.a.           | n.a.            | n.a.             |
| <i>aos</i> <sup>Δ7</sup> <i>FRT</i> <sup>80B</sup> / <i>P[decDN]172.1 FRT</i> <sup>80B</sup>   | 1565       | 0.2 (3)      | 1                   | 1              | 1               | 0                |
| <i>aos</i> <sup>Δ7</sup> <i>FRT</i> <sup>80B</sup> / <i>P[decDN]225.5 FRT</i> <sup>80B</sup>   | 3525       | 0.06 (2)     | 2                   | 0              | 0               | 0                |

n.a., not applicable. Eggshell phenotype is only scored for intact eggs.
