# Supplementary material for: Graded Egfr activity patterns theDrosophilaeggshell independently of autocrine feedback
Source: Oxford University Press journal article supplement (doi:10.1242/dev.036103), 2009-07-30
Supplement: dev036103tables2.pdf [file dev036103tables2.pdf]

**Table S2. Appendage phenotype of *P[decDN]* collapsed eggs recovered from mosaic females**

| Genotype                                                                     | Collapsed eggs* | Appendage phenotype % (n) |                |                 |                  |                 |
|------------------------------------------------------------------------------|-----------------|---------------------------|----------------|-----------------|------------------|-----------------|
|                                                                              |                 | Separate bases            | Bases touching | Partially fused | Completely fused | None or reduced |
| <i>FRT<sup>80B</sup>/P[decDN]118.3 FRT<sup>80B</sup></i>                     | 318             | 98.8 (314)                | 0.6 (2)        | 0 (0)           | 0 (0)            | 0.6 (2)         |
| <i>FRT<sup>82B</sup> pnt<sup>Δ78</sup>/FRT<sup>82B</sup> P[decDN]2.129.3</i> | 254             | 81.5 (207)                | 0 (0)          | 7.5 (19)        | 10.2 (26)        | 0.8 (2)         |
| <i>mirr<sup>e48</sup> FRT<sup>80B</sup>/P[decDN]225.5 FRT<sup>80B</sup></i>  | 255             | 92.9 (237)                | 0 (0)          | 0 (0)           | 0(0)             | 7.1 (18)        |
| <i>rho<sup>7M43</sup> FRT<sup>80B</sup>/P[decDN]118.3 FRT<sup>80B</sup></i>  | 244             | 94.7 (231)                | 0.4 (1)        | 0 (0)           | 0 (0)            | 4.9 (12)        |
| <i>spi<sup>1</sup> FRT<sup>40A</sup>/P[decDN]006.1 FRT<sup>40A</sup></i>     | 238             | 100 (238)                 | 0 (0)          | 0 (0)           | 0 (0)            | 0 (0)           |
| <i>aos<sup>Δ7</sup> FRT<sup>80B</sup>/P[decDN]172.1 FRT<sup>80B</sup></i>    | 332             | 92.8 (308)                | 3.3 (11)       | 0 (0)           | 0 (0)            | 3.9 (13)        |
| <i>aos<sup>Δ7</sup> FRT<sup>80B</sup>/P[decDN]225.5 FRT<sup>80B</sup></i>    | 240             | 98.8 (237)                | 0.8 (2)        | 0 (0)           | 0 (0)            | 0.4 (1)         |

\*A random sample of collapsed eggs was analyzed for each genotype.
